# Supplementary material for: Cadmium-doped flexible perovskite solar cells with a low-cost and low-temperature-processed CdS electron transport layer
Source: Royal Society of Chemistry journal article supplement (doi:10.1039/c7ra01110e), 2017-01-01
Supplement: c7ra01110e1.pdf [file c7ra01110e1.pdf]

## Supporting Information to

### **Cadmium-doped flexible perovskite solar cells with low-cost and low-temperature-processed CdS electron transport layer**

Guoqing Tong,<sup>a</sup> Zihang Song,<sup>b</sup> Chengdong Li,<sup>a</sup> Yaolong Zhao,<sup>a</sup> Linwei Yu,<sup>\*,a</sup> Jun Xu,<sup>a</sup> Yang Jiang,<sup>\*,b</sup> Yun Sheng,<sup>c</sup> Yi Shi,<sup>a</sup> and Kunji Chen<sup>a</sup>

<sup>a</sup>National Laboratory of Solid State Microstructures and School of Electronics Science and Engineering/Collaborative Innovation Centre of Advanced Microstructures, Nanjing University, Nanjing 210093, P. R. China. Email: [yulinwei@nju.edu.cn](mailto:yulinwei@nju.edu.cn).

<sup>b</sup>School of Materials Science and Engineering, Hefei University of Technology, Hefei 230009, P. R. China, Email: [apjiang@hfut.edu.cn](mailto:apjiang@hfut.edu.cn).

<sup>c</sup>State Key Lab of Photovoltaic Science and Technology, Trina Solar, Changzhou 213031, P. R. China.

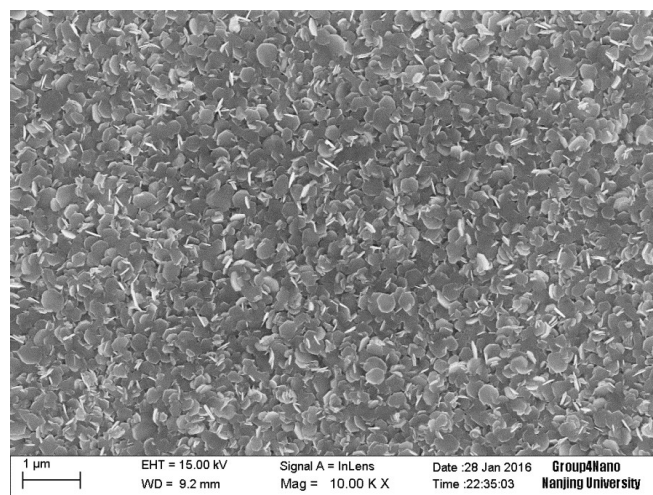

**Fig. S1** Low magnification of PbI<sub>2</sub> thin film on the FTO/CdS substrate.

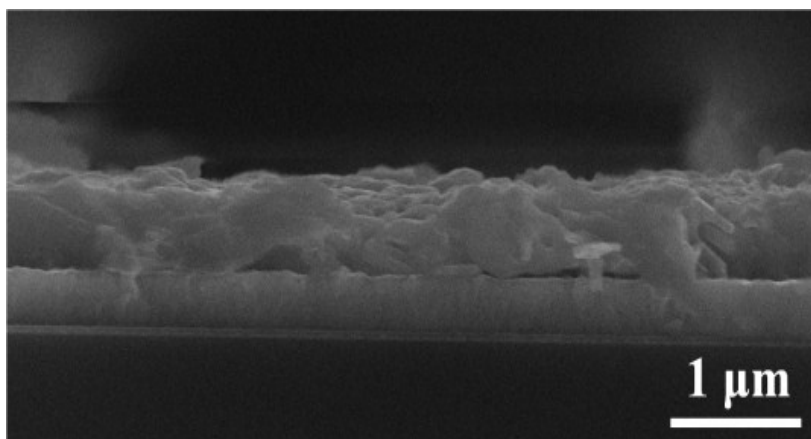

**Fig. S2** The cross-section SEM image of the perovskite film.

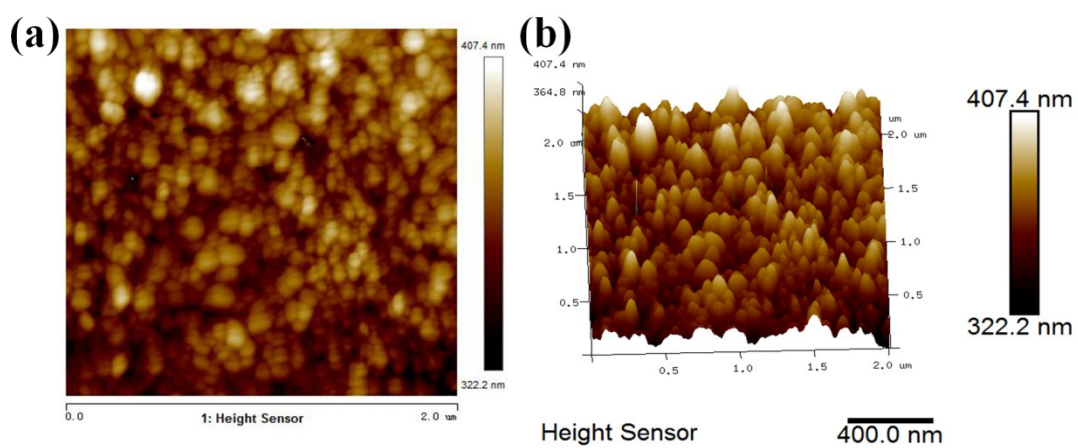

**Fig. S3** The AFM images of CdS thin film deposited on FTO substrate by CBD process (a) 2D, (b) 3D.

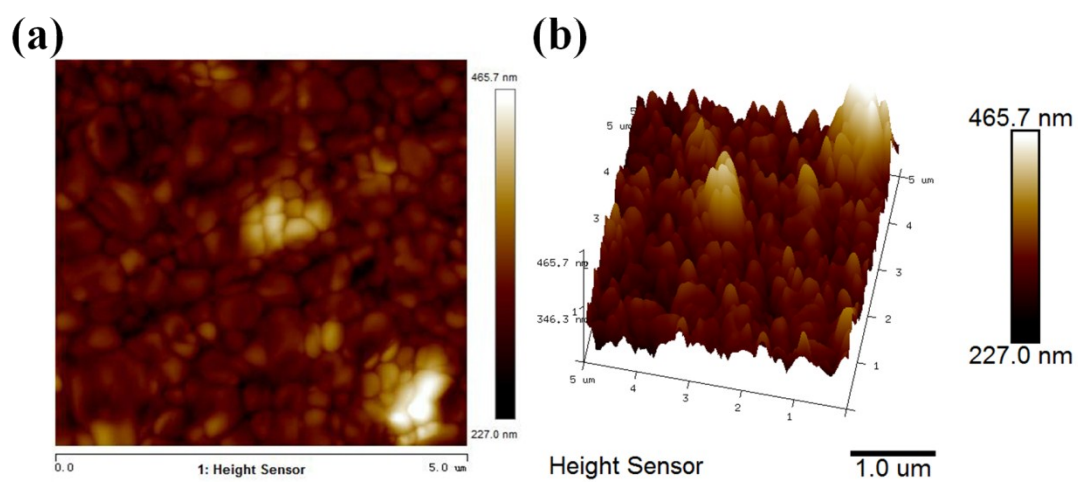

**Fig. S4** The AFM images of perovskite thin film deposited on FTO/CdS substrate by

CBD process (a) 2D, (b) 3D.

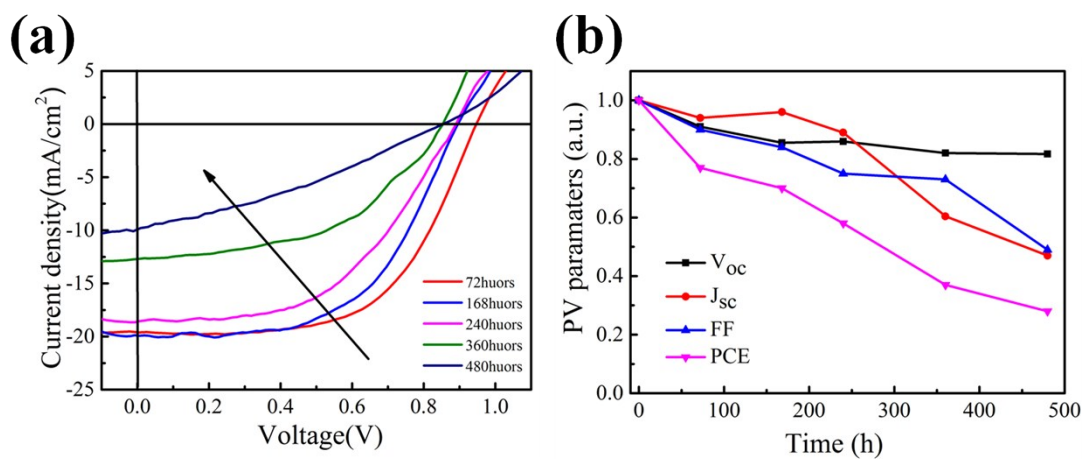

**Fig. S5** Stability of the CdS-based PSCs (a) J-V curve, (b) the evolution of the photovoltaic parameters with time.

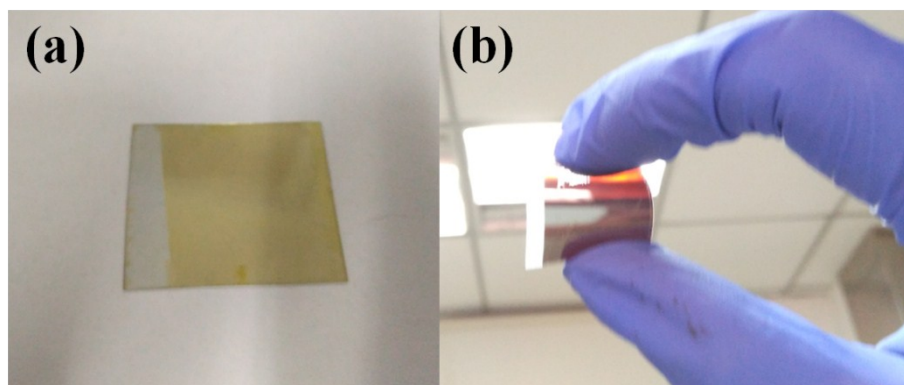

**Fig. S6** Photograph of (a) CdS thin film on the PET/ITO substrate. (b) perovskite thin film on the PET/ITO/CdS substrate.
